# Supplementary material
Source: PubMed Central journal article supplement (PMC3623677)
Supplement: NIHMS448650-supplement-Supplementary_Data.pdf [file NIHMS448650-supplement-Supplementary_Data.pdf]

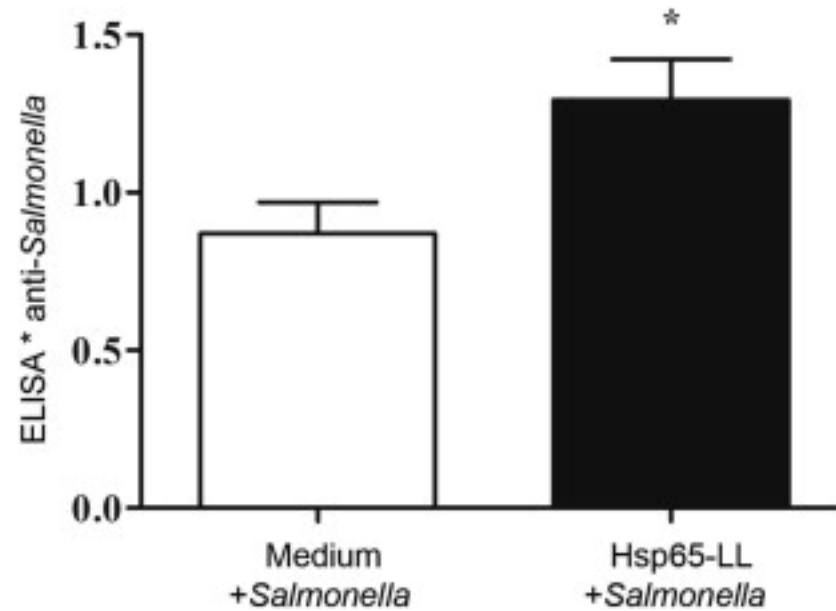

Supplemental Fig. 1 Pretreatment of mice with *M. leprae*-Hsp65-producing *L. lactis* does not decrease immune response against *Salmonella enterica* serovar Typhimurium. C57BL/...

Rafael M. Rezende , Rafael P. Oliveira , Samara R. Medeiros , Ana C. Gomes-Santos , Andrea C. Alves , Flávia G. Lo...

**Hsp65-producing *Lactococcus lactis* prevents experimental autoimmune encephalomyelitis in mice by inducing CD4<sup>+</sup>LAP<sup>+</sup> regulatory T cells**

Journal of Autoimmunity Volume 40 2013 45 - 57

<http://dx.doi.org/10.1016/j.jaut.2012.07.012>

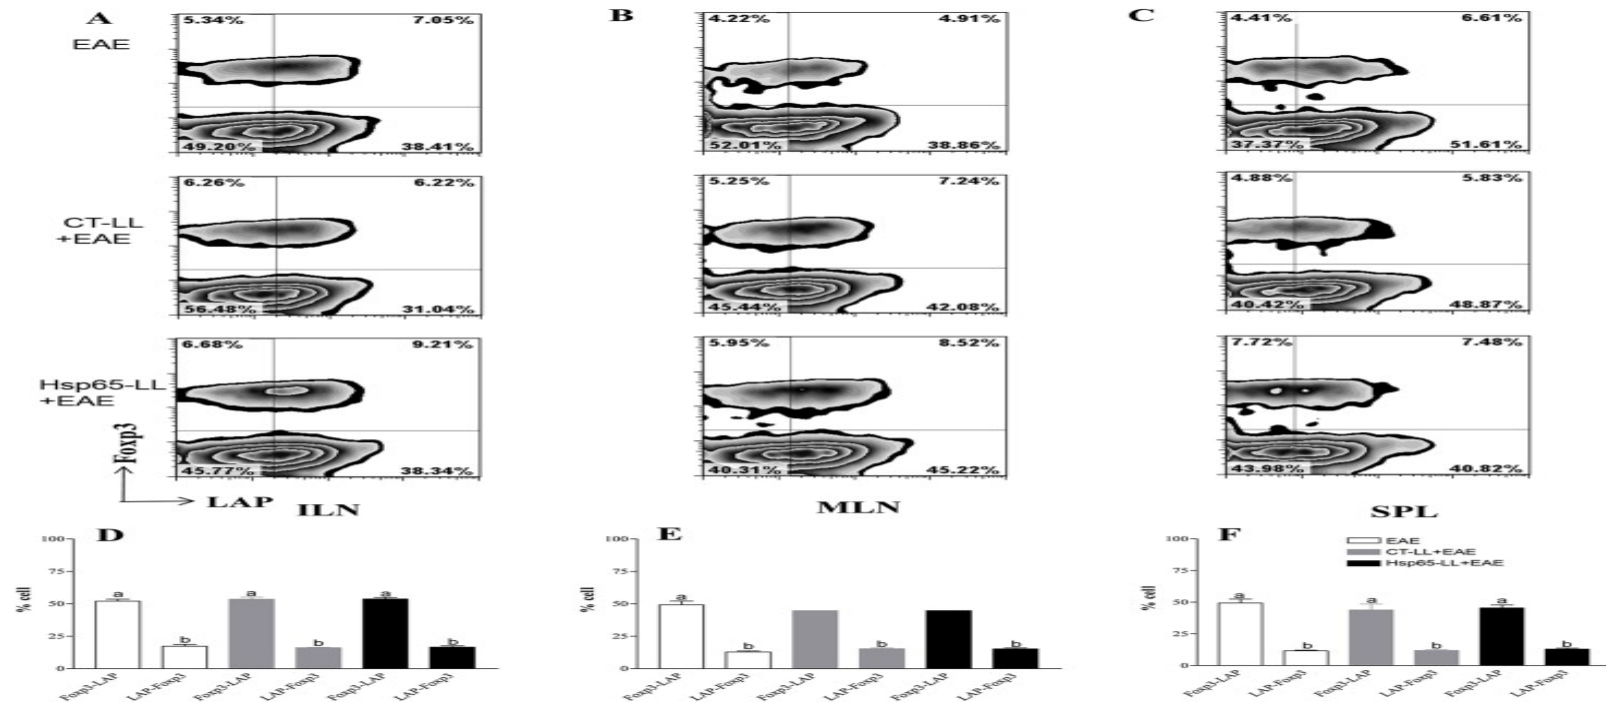

Supplemental Fig. 2 Frequencies of CD4<sup>+</sup> T cells co-expressing of Foxp3 and LAP. C57BL/6 Foxp3-GFP knock-in mice were fed or not (Na<sup>+</sup>ve) medium (EAE), control (CT-LL+EAE) or *M. leprae*-Hsp65-producing *L. lactis*...

Rafael M. Rezende , Rafael P. Oliveira , Samara R. Medeiros , Ana C. Gomes-Santos , Andrea C. Alves , Flávia G. Lo...

**Hsp65-producing *Lactococcus lactis* prevents experimental autoimmune encephalomyelitis in mice by inducing CD4<sup>+</sup>LAP<sup>+</sup> regulatory T cells**

Journal of Autoimmunity Volume 40 2013 45 - 57

<http://dx.doi.org/10.1016/j.jaut.2012.07.012>
